1 **The *de novo* reference genome and transcriptome assemblies of the wild tomato species *Solanum***  
2 ***chilense***

3

4 Remco Stam<sup>1,2\*§</sup>, Tetyana Nosenko<sup>3,4§</sup>, Anja C. Hörger<sup>5</sup>, Wolfgang Stephan<sup>6</sup>, Michael Seidel<sup>3</sup>, José M.M.  
5 Kuhn<sup>7</sup>, Georg Haberer<sup>3#</sup>, Aurelien Tellier<sup>2#</sup>

6

7 1 Phytopathology, Technical University Munich, Germany

8 2 Population Genetics, Technical University Munich, Germany

9 3 Plant Genome and Systems Biology, Helmholtz Center of Munich, Germany

10 4 Environmental Simulations, Helmholtz Center of Munich, Germany

11 5 Department of Biosciences, University of Salzburg, Austria

12 6 Evolutionary Biology, LMU Munich and Natural History Museum Berlin, Germany

13 7 Evolutionary Biology and Ecology, Albert-Ludwig University of Freiburg, Germany

14

15 \*corresponding author: [stam@wzw.tum.de](mailto:stam@wzw.tum.de)

16 § contributed equally

17 # contributed equally

18

19 **Keywords:**

20 Genome sequence assembly, Transcriptome, Evolutionary Genomics, Tomato, NLR genes

21 **ABSTRACT**

22 **Background**

23 Wild tomato species, like *Solanum chilense*, are important germplasm resources for enhanced biotic and  
24 abiotic stress resistance in tomato breeding. In addition, *S. chilense* serves as a model system to study  
25 adaptation of plants to drought and to investigate the evolution of seed banks. However to date, the absence  
26 of a well annotated reference genome in this compulsory outcrossing, very diverse species limits in-depth  
27 studies on the genes involved.

28

29 **Findings**

30 We generated ~134 Gb of DNA and 157 Gb of RNA sequence data of *S. chilense*, which yielded a draft  
31 genome with an estimated length of 914 Mb in total encoding 25,885 high-confidence (hc) predicted gene  
32 models, which show homology to known protein-coding genes of other tomato species. Approximately 71%  
33 (18,290) of the hc gene models are additionally supported by RNA-seq data derived from leaf tissue  
34 samples. A benchmarking with Universal Single-Copy Orthologs (BUSCO) analysis of predicted gene models  
35 retrieved 93.3% BUSCO genes, which is in the current range of high-quality genomes for non-inbred plants.  
36 To further verify the genome annotation completeness and accuracy, we manually inspected the NLR  
37 resistance gene family and assessed its assembly quality. We revealed the existence of unique gene families  
38 of NLRs to *S. chilense*. Comparative genomics analyses of *S. chilense*, cultivated tomato *S. lycopersicum*  
39 and its wild relative *S. pennellii* revealed similar levels of highly syntenic gene clusters between the three  
40 species.

41

42 **Conclusions**

43 We generated the first genome and transcriptome sequence assembly for the wild tomato species *Solanum*  
44 *chilense* and demonstrated its value in comparative genomics analyses. We make these genomes available  
45 for the scientific community as an important resource for studies on adaptation to biotic and abiotic stress in  
46 *Solanaceae*, on evolution of self-incompatibility, and for tomato breeding.

47

48

## 49 INTRODUCTION

50 Tomato (*Solanum lycopersicum*) is arguably the most important vegetable crop and an important model  
51 organism for fleshy fruit development [1,2]. Together with its wild relatives it is also an interesting model  
52 system regarding tolerance to abiotic and biotic stresses such as pathogens. As with many crops, tomato  
53 breeders have often used germplasm of wild relatives to improve cultivar quality, including enhanced stress  
54 tolerance [3]. Several wild tomato species have been sequenced. Genome assemblies exist, for *S.*  
55 *habrochaites*, *S. pimpinellifolium* and *S. pennellii*. Yet, fully accessible and annotated reference genomes  
56 sequences to date are only available for the cultivated tomato *S. lycopersicum* [1] and the selfing wild tomato  
57 relative *S. pennellii* [3]. Here we present a reference genome assembly, annotation and additional *de novo*  
58 leaf transcriptome assemblies for a stress tolerant and outcrossing wild tomato species, *S. chilense*.  
59 *S. chilense* occurs on the southern edge of the wild tomato species range, in southern Peru and northern  
60 Chile. It belongs to the section Peruvianum, which contains four closely related wild tomato species, of which  
61 *S. chilense* forms a monophyletic subclade [4]. *S. chilense* split from its nearest sister species *S.*  
62 *peruvianum*, occurring in central and southern Peru, about 1 mya [5,6]. Since then, the species has migrated  
63 southward and colonised diverse arid habitats both in mountainous and coastal terrain bordering the  
64 Atacama desert and characterized by low temperature or extreme aridity, respectively [7]. (Figure 1)  
65 *S. chilense* has been extensively used as a non-model organism for its interesting ecology and thus several  
66 studies focused on drought [8] salt [9,10] and cold tolerance [11], as well as for adaptation to extreme  
67 environments [12,13]. Furthermore, as an outcrossing species it has been used to understand the breeding  
68 system evolution (self-incompatibility) in the tomato clade [14]. The species is characterized by high levels of  
69 genetic diversity [5–7] probably due to existence of seed banking [15]. Besides its role as a study system, *S.*  
70 *chilense* has been used as a resource in tomato breeding. For example, genes from *S. chilense* have been  
71 successfully used to enhance resistance to the fungal pathogen *Verticillium dahliae* [16] and to the Tomato  
72 Mosaic Virus Y (resistance genes *Ty-1* and *Ty-3*) in *S. lycopersicum* [17].

73

74 To corroborate the quality of our reference genome, and to demonstrate its value for future molecular and  
75 genomic studies, we compared the NLR family in *S. chilense* with those in cultivated tomato (*S.*  
76 *lycopersicum*) and the wild relative *S. pennellii*. Canonical pathogen resistance genes in plants often belong  
77 to the NLR family (Nod-like receptor or Nucleotide binding site, leucine rich repeat containing receptor) [18].  
78 NLRs are modular and contain an N-terminal domain that can be a Toll-Interleukin Receptor (TIR) or a Coiled  
79 Coil (CC) domain, followed by a Nucleotide Binding Site (NBS) domain and several Leucine Rich Repeats  
80 (LRR). Complete NLRs have all three domains, whereas partial NLRs lack one or the other. NLRs are  
81 involved in signalling of the plant immune system and, interestingly, also partial NLRs can be functional in

82 resistance signalling [19]. TIR-domain-containing NLRs are called TNL and CC-domain-containing NLR are  
83 referred to as CNL. The latter can again be subdivided into several clades. NLRs are thus divided into  
84 several functional sub-clades, for most of which the molecular function is still unknown.

85 Because of their importance to plant health, NLR evolution has been extensively studied in numerous plant  
86 species. Comparative studies in *S. lycopersicum* and some of its wild relatives revealed interesting  
87 interspecific differences of the NLR complement [20]. The cultivated tomato and its most closely related  
88 relative, *Solanum pimpinellifolium*, contain respectively 326 and 355 NLRs, while *S. pennellii* contains only  
89 216 putative NLRs [21]. These substantial differences in NLR repertoire are hypothesised to be the result of a  
90 birth and death process [22] could possibly be explained by differences in pathogen pressure. *S.*  
91 *pimpinellifolium* and ancestors of *S. lycopersicum* are found in northern South-America and Central America  
92 in climatic areas possibly more pervasive for pathogens. In contrast, *S. pennellii* for example occurs in  
93 generally dryer habitats with lower pathogen pressure, than the cultivated tomato ancestor. Nevertheless, the  
94 same functional subclades could be found in these three tomato species, albeit exhibiting different numbers  
95 of gene members.

96

97

## 98 **Data description**

99

### 100 **First *S. chilense* genome sequence assembly**

101 Species within the Peruvianum group have diverged relatively recently [4] and exhibit high intraspecific  
102 genetic and phenotypic diversity. Hence, species assignment of individuals from this complex can be  
103 ambiguous [23]. To confirm that our newly sequenced plant is indeed *S. chilense* we performed phylogenetic  
104 comparisons of our sequenced individual and publicly available sequence data from *S. chilense* and *S.*  
105 *peruvianum*. We mapped our sequence data as well as data from all nine publicly available *S. peruvianum*  
106 and presumed *S. chilense* data [2,24] (accessions described in Figure 2) against the *S. pennellii* reference  
107 genome [3] using STAMPY [25] (substitution rate 0.01, insert size 500). The SNP calling and filtering was  
108 done using samtools (mpileup, call -m with default parameters). For all 12 accessions we extracted the  
109 sequence at six CT loci (CT066, CT093, CT166, CT179, CT198, CT268). These are single-copy cDNA  
110 markers developed and mapped in Tanksley et al. [26] and have previously been used to investigate the  
111 evolutionary relationships of wild tomato species (e.g. [6,7,27]). To account for heterozygosity, two alleles  
112 were constructed randomly per individual. A concatenated alignment was prepared and manually checked.  
113 To this alignment we added 53 sequences obtained by Sanger sequencing in previous work on *S. chilense*  
114 and *S. peruvianum* [5]. These sequences originate from *S. chilense* or *S. peruvianum* accessions as  
115 identified by the TGRC (UC Davis, USA) according to the taxonomic key in Peralta et al. [28]. *S. ochranthum*  
116 (accession LA2682) was used as an outgroup. The phylogenetic reconstruction (Figure 2A) was obtained by  
117 the Maximum Likelihood method (GTR+Gamm+I algorithm with 1000 bootstrap replicates) as implemented  
118 in RaxML [29]. We find that all previously robustly assigned *S. chilense* accessions [5] and our LA3111  
119 individual cluster together into a well-supported monophyletic group (Figure 2A), while the recently  
120 sequenced accessions from Aflitos et al [24] and Lin et al [2] form a polyphyletic group with known *S.*  
121 *peruvianum* samples. Similar results were obtained using UPMGA and the Maximum Likelihood  
122 method (implemented in Geneious 8) [30].

123 Additionally, we reconstructed the chloroplast phylogeny of the members of the *S. peruvianum* clade. We  
124 mapped our newly sequenced reads from LA3111, as well as from all nine publicly available *S. peruvianum*  
125 and presumed *S. chilense* data (see above) against the *S. pennellii* reference genome [3] using STAMPY  
126 [25] (substitution rate 0.01, insert size 500). The SNP calling and filtering was done using samtools (mpileup,  
127 call -m with default parameters) and the reconstructed alternative sequences were extracted from *S.*  
128 *pennellii* for the coding regions of the chloroplast for each of the samples. These aligned sequences were  
129 used for phylogenetic tree construction using PhyML [31] (ML, GTR, 1000 bootstraps, Best of NNI&SPR,  
130 BioNJ). The resulting tree was visualised in and edited for publication using Figtree [32]. All previously

131 sequenced samples are found as a polyphyletic group, which is a topology known for the species *S.*  
132 *peruvianum*, whereas our *S. chilense* sample forms a separated branch (Figure 2B). Thus phylogenetic  
133 analyses of both nuclear- and plastid-encoded genes confirm that data presented in this study are the first  
134 instance of the *S. chilense* genome sequence assembly.

135

### 136 **De novo genome sequence assembly for *S. chilense* LA3111**

137 Four sequencing libraries were produced for one plant from accession number LA3111 with insert sizes of  
138 300bp and 500-550bp for paired-end sequencing, and 8kb and 20kb for long jumping distance protocols. In  
139 total we generated ~134 Gb of raw data (Table S1). We used the Celera assembler (CAv8.3;  
140 <https://sourceforge.net/projects/wgs-assembler/files/wgs-assembler/wgs-8.3>) employing stitched and  
141 unassembled MiSeq read data to generate contigs. The fragment correction module and the bogart unitigger  
142 of the Celera assembler was applied with a graph and merge error rate of 5%. Minimal overlap length,  
143 overlap and merge error rates were set to 50bp and 6% each, respectively. The final contig assembly  
144 comprised 150,750 contigs ranging from 1 to 162kb totalling ~717.7 Mb of assembled genome sequence  
145 with a N50 of 9,755 bp. The resulting contigs were linked to scaffolds by SSPACE using all four available  
146 libraries of LA3111 [33]. Scaffolds were further processed by five iterations of GapFiller and corrected by  
147 Pilon in full-correction mode [34,35]. The 81,307 final scaffolds span a total size of 914 Mb with a N50 of 70.6  
148 kb (Table 1). To check for genome and assembly completeness, we used D-Genies [36] to create a dotplot of  
149 our scaffolds against the *S. pennellii* (Figure 3) or *S. lycopersicum* (Figure S1). chromosomes. In both cases,  
150 these plots reveal nearly full coverage of the chromosomes compared to *S. pennellii* and *S. lycopersicum*.

151

152 *Table 1. S. chilense* genome assembly

|                           |           |
|---------------------------|-----------|
| Total size (Mbp)          | 913.89    |
| Scaffolds                 | 81,307    |
| N50 Scaffolds (bp)        | 70,632    |
| Max Scaffold length (bp)  | 1,123,112 |
| High confidence gene loci | 25,885    |

153

154

### 155 **De novo assembly of *S. chilense* leaf transcriptome**

156 Twenty four Illumina paired-end read RNA-Seq libraries were generated for 12 *S. chilense* plants from  
157 populations LA3111 and LA2750 (Table 2). Replicates were obtained by propagating plants vegetatively.  
158 Total RNA was extracted from leaf tissue samples from multiple mature plants under normal and stress  
159 (chilling, 6h at 4°C) conditions using the RNeasy Plant Mini Kit (Qiagen GmbH, Hilden, Germany) and  
160 purified from DNA using the TURBO DNA-free Kit (Ambion, Darmstadt, Germany). RNA concentration and

161 integrity were assessed using a Bioanalyzer 2100 (Agilent Technologies, Waldbronn, Germany). The  
162 preparation of randomly primed paired-end Illumina HiSeq2500 libraries and sequencing were conducted by  
163 the GATC Biotech AG. Data for each population were assembled *de novo* using Trinity [37], SOAPdenovo-  
164 Trans [38] and Oases-Velvet [39]; the redundancy acquired from pooling the three assemblies was reduced  
165 using the EvidentialGene pipeline [40]. The resulting transcriptome assemblies contain 41,666 and 35,470  
166 transcripts and, according to the BUSCO [41] assessment are 93.7 and 94.2% for LA3111 and LA2750,  
167 respectively (Table S2).

168

169 *Table 2. S. chilense de novo transcriptome assemblies*

| Statistics          | <i>S. chilense</i> transcriptome |        |
|---------------------|----------------------------------|--------|
|                     | LA3111                           | LA2750 |
| Total contig number | 41,666                           | 35,470 |
| Minimum length (bp) | 123                              | 123    |
| Maximum length (bp) | 16,476                           | 16,473 |
| Average length (bp) | 831                              | 943    |
| Median length (bp)  | 504                              | 684    |
| N50 (bp)            | 1383                             | 1458   |
| N90 (bp)            | 351                              | 432    |

170

## 171 **Gene model prediction**

172 We applied a previously described consensus approach [42] to derive gene structures from the *S. chilense*  
173 draft genome. Briefly, *de novo* gene finders Augustus [43], Snap [44], and GeneID [45] were trained on a set  
174 of high confidence models that were derived from the LA3111 and LA2750 transcriptome assemblies.  
175 Existing matrices for eudicots and *S. lycopersicum* were used for predictions with EgenesH [46] and  
176 GlimmerHMM [47], respectively. Predictions were weighted by a decision tree using the JIGSAW software  
177 [48]. Spliced alignments of known proteins and *S. chilense* transcripts of this study were generated by the  
178 GenomeThreader tool [49]. We used current proteome releases (status of August 2016) of *Arabidopsis*  
179 *thaliana*, *Medicago truncatula*, *Ricinus communis*, *S. lycopersicum*, *Glycine max*, *Nicotiana benthamiana*,  
180 *Cucumis sativa* and *Vitis vinifera*. Spliced alignments required a minimum alignment coverage of 50% and a  
181 maximum intron size of 50kb under the *Arabidopsis* splice site model. Next, *de novo* and homology  
182 predictions were merged to top-scoring consensus models by their matches to a reference blastp database  
183 comprising *Arabidopsis*, *Medicago* and *S. lycopersicum* proteins. In a last step, we annotated the top-scoring  
184 models using the AHRD (“A human readable description”)-pipeline [42] and InterProScan v. 5.21 [50] to  
185 identify and remove gene models containing transposon signatures. The resulting final models were then  
186 classified into high scoring models according to an alignment consistency of  $\geq 90\%$  for both the *S. chilense*  
187 query and a subject protein of a combined *S. lycopersicum* and *S. pennellii* database.



188 This way, we predicted 25,885 high-confidence (hc) gene loci that show high homology and coverage to  
189 known proteins of tomato species. Besides their support by homology, approximately 71% (18,290) of the hc  
190 genes are additionally supported by RNA-seq data derived from leaf tissue samples. To obtain the RNA-seq  
191 support for the predicted gene models, raw RNA-seq data were processed (adapter and quality trimming)  
192 using Trimmomatic v.0.35 [51][Bolger et al., 2014] and aligned to the *S. chilense* genome sequence  
193 assembly using STAR v.2.5 [52](Dobin et al. 2013). Read pairs aligned to exonic regions of predicted gene  
194 models were summarized per gene using featureCounts [53].

195 Complementary to the set of hc models, we report the presence of 41,481 low confidence (lc) loci to  
196 maximize gene content information. Functionality for some of these models (6,569) is suggested by  
197 transcriptome evidence from the leaf RNA-seq data.

198 Functional gene annotation and assignment to the GO term categories were performed using Blast2GO v.  
199 4.1 [54] based on the results of InterProScan v. 5.21 [50] and BLAST [55] similarity searches against the  
200 NCBI non-redundant sequence database. KEGG pathway orthology assignment of protein-coding genes was  
201 conducted using KAAS [56].

202

### 203 **Completeness and gene model validation**

204 The completeness of the assembled genome was assessed using BUSCO [41] and was at 91.8% for the  
205 genome assembly. Fragments were found for 3.1 additional BUSCO orthologs. These numbers are relatively  
206 similar to scores found for previously annotated *S. lycopersicum* and *S. pennellii* (Table S3).

207 In addition, we assessed synteny between the genomes of three tomato species, *S. chilense* (this study), *S.*  
208 *lycopersicum* (NCBI genome annotation release 102, ITAG2.4), and *S. pennellii* (NCBI genome annotation  
209 release 100, v2). Orthologous pairs of protein-coding genes were identified using reciprocal BLAST searches  
210 with an e-value threshold of  $10^{-30}$  and maximum target sequence number 50. For *S. lycopersicum* and *S.*  
211 *pennellii*, the longest splice variant for each gene was used as a BLAST input. A spatial distribution of  
212 resulting orthologous gene pairs was analysed and gene blocks conserved between genomes (syntenic)  
213 were identified using iADHoRe (hybrid mode with minimum syntenic block size = 3; [57]). For tandem arrays  
214 of genes, a single representative was retained in syntenic blocks.

215 We found that our *S. chilense* gene models (hc and lc) show homology to respectively 24,651 *S.*  
216 *lycopersicum* and 25,695 *S. pennellii* genes. Of these, 14,013 and 12,984 genes belong to 2,533 and 2,364  
217 syntenic gene blocks conserved between *S. chilense* and *S. lycopersicum* or *S. pennellii*, respectively (Table  
218 S4, S5). To compare, 977 syntenic gene blocks were detected between *S. lycopersicum* and *S. pennellii*  
219 genomes using the same parameters consisting of 18,107 and 17,933 gene models, respectively (Table S6,  
220 S7). Synteny dotplots in Figures 3 and S1 illustrate a nearly full coverage between the *S. chilense* scaffolds



221 and *S. pennellii* or *S. lycopersicum* chromosomes. Our gene synteny analyses, confirms that also on gene  
222 level our assembly shows large syntenic blocks and thus is relatively complete.

223 Thus, even though *S. chilense* genome sequence assembly is more fragmented, we can already conclude  
224 that the *S. chilense* genome is largely organised as the cultivated tomato and *S. pennellii* genomes, though  
225 gene copy numbers vary slightly and small rearrangements did occur.

226

## 227 **NLR identification**

228 To further evaluate the completeness and quality of the *S. chilense* gene model predictions presented in this  
229 study, we conducted a detailed analysis of the NLR gene family, a rapidly evolving and thus highly diverse  
230 between species group of genes [58]. Loci encoding putative NLR genes were identified using NLRParser  
231 [59] with cut-off thresholds as described before [21]. We manually inspected all regions with NLR motifs and  
232 updated the annotated open reading frames where this was required. The improved annotation was based  
233 on NLR motifs, sequence homology to known NLRs and expression evidence (from the RNA-seq data). In  
234 total we found 236 putative NLRs, of which 139 are CNLs and 35 TNLs. 62 NLRs cannot be assigned to  
235 either class. Most CDS were supported by all three measures. Only 15 NLR genes were manually curated,  
236 using the RNA-Seq data aligned to the reference genome. In ten instances frame shifts made it impossible to  
237 enhance the gene model. For these genes the computationally predicted CDS were retained. The remaining  
238 211 predicted NLR gene models showed to be well resolved and did not require any correction. The total  
239 number of NLRs identified in *S. chilense* the *S. chilense* genome is lower than in cultivated tomato (355) and  
240 more similar to *Solanum pennellii* (216) (Supplementary material)[3].

241

242 The syntenic blocks identified between the *S. chilense* and the *S. lycopersicum* and *S. pennellii* genomes  
243 include 69 and 50 hq NLR genes, respectively, and show that NLRs are distributed across all twelve  
244 chromosomes (Supplementary material). Except for several short tandems of identical or nearly identical  
245 gene copies, NLRs do not tend to form any positional clusters in tomato genomes. Only 30% of *S. chilense*  
246 NLRs belong to syntenic gene blocks (compared to *S. lycopersicum* and *S. pennellii*) showing the fast  
247 evolution and genomic organisation of this gene family at the phylogenetic time scale (over millions of  
248 years) .

249 To further confirm the relative completeness of the NLR set in *S. chilense*, we reconstructed a phylogeny for  
250 the gene family based on the NBS protein sequences of the NLRs. Functional clades are assigned based on  
251 protein sequences of the NBS, using the same methods as described in Jupe et al. [60]. To define NLR  
252 clusters BLASTp searches were used to link new clusters to previously identified ones [60]. In one instance,

253 members of our new cluster matched two previously defined clusters equally well, this cluster thus has  
254 double naming (CNL1/CNL9). The NLRs in two identified clusters did not match any NLRs that had been  
255 clustered previously, in these cases new cluster numbers were assigned (CNL20, CNL21).

256 All major NLR clades found in *S. lycopersium* and *S. pennellii* are present in the *S. chilense* genome (Figure  
257 4). There are some small, but interesting differences with other tomato species. The CNL-4 and CNL-15  
258 clusters contained four or five members in *S. lycopersicum*, yet in *S. chilense* each had only one member. In  
259 addition, we identified two new clades, CNL20 and CNL21 and when directly comparing *S. pennellii* and *S.*  
260 *chilense*, some clades have more members in the former, and others in the latter (Figure S2) and confirm the  
261 birth and death of NLR between species. Similar differences can be seen between *S. pennellii* and *S.*  
262 *lycopersicum* [21].

263

## 264 **Conclusions**

265 We present the draft genome sequence assembly and *de novo* transcriptome assemblies of the wild tomato  
266 species *S. chilense*. Using several complementary methods, including comparative analyses for a large and  
267 complex gene family such as the NLR-family, we show that quality of this genome assembly and annotation  
268 satisfy requirements for a reference genome for comparative genomics studies.

269

## 270 **Data availability**

271 The *S. chilense* genome data and raw RNA-seq data generated for this study deposited to the NCBI Short  
272 Read Archive under the BioProject IDs PRJNA508893 and PRJNA474106. The *S. chilense* genome  
273 sequence assembly and annotation, CDS and protein models and *de novo* leaf transcriptome assemblies  
274 (for the accessions LA3111 and LA2750) are also available as Supplementary Materials and through Sol  
275 Genomics Network (<https://solgenomics.net/>).

276

277

## 278 **Acknowledgements**

279 RS was supported by the Alexander von Humboldt foundation. *S. chilense* genome sequencing was funded  
280 by DFG grant TE 809/7-1 to AT. Generating and sequencing of the *S. chilense* RNA-Seq data was supported  
281 by the DFG grant STE 325/15 to WS. We thank the TGRC at UC Davis (USA) for providing the plant  
282 material.

283

## 284 **Authors contributions**

285 Conceptualisation: RS, AT, GH, Methodology: RS, GH, TN, AT, Formal analysis: RS, TN, AH, AT, GH, HK,  
286 Resources. RS, AH, TN, WS, Data curation: RS, TN, MS, Writing – Original draft: RS, TN, GH Writing –  
287 Review & Editing, RS, AH, TN, AT, WS, Visualisation: RS, Supervision RS, GH, AT, WS.

288

## 289 **Figure Legends**

290 Figure 1

291 Pictures of *S. chilense* populations in their natural habitat (taken by R. Stam). The top panels show coastal  
292 and lowland habitats, the lower panels, typical mountain habitats. LA3111 originates from a mountainous  
293 habitat, similar to the last panel.

294

295 Figure 2

296 A) Phylogeny based on six CT loci (nuclear genes) extracted from our sequenced *S. chilense* sample and  
297 previously sequenced *S. peruvianum* and alleged *S. chilense* samples. Our specimen from accession  
298 LA3111, is indicated with \*.

299 The phylogeny was constructed after extracting the data mapped to the *S. pennellii* reference genome. A tree  
300 was built for the aligned and concatenated sequences using the Maximum Likelihood method (1000  
301 bootstrap replicates). Bootstrap values are reported on each of the branches. *Solanum ochranthum* was  
302 used as an outgroup. Chil and peru indicates Sanger sequence from *S. chilense* and *S. peruvianum*  
303 individuals, respectively.

304

305 B) Phylogeny of SNPs in chloroplasts extracted from our sequenced *S. chilense* sample and previously  
306 sequenced *S. peruvianum* and alleged *S. chilense* samples.

307 The tree was constructed after extracting the data mapped to the *S. pennellii* reference genome. A tree was  
308 built for the aligned sequences using PhyML (GTR, NNI, BioNJ, 1000 bootstrap replicates). Bootstrap values  
309 are reported on each of the branches.

310

311 Individuals ERR418084 and ERR418094: *S. peruvianum* (data from Aflitos et al. 2014), individuals  
312 ERR418097 and ERR418098: formerly labelled as *S. chilense*, but probably different species identity (data  
313 from Aflitos et al. 2014). This classification has since been withdrawn from the CGN database. The  
314 accompanying pictures on the CGN website are not showing *S. chilense* plants. Individuals SRR1572692,  
315 SRR1572694 and SRR1572695: *S. peruvianum* (data from Jin et al. 2014), and individual SRR1572696: was  
316 reported as *S. chilense* in the main text of the paper (Jin et al., 2014), but the authors confirm it is *S.*

317 *peruvianum*, as is written in the supplementary data of their paper that contains all origin data. (data from Jin  
318 et al. 2014).

319

320 Figure 3

321 Dotplot analysis of *S. chilense* scaffolds against the *S. pennellii* chromosomes, made using D-Genies [36].  
322 Green lines indicate >75% identity. Orange >60%. The x axis shows the position on *S. pennellii*  
323 chromosomes and the y axis on the *S. chilense* scaffolds

324

325 Figure 4

326 Phylogenetic tree (ML) for the NLRs identified in *S. chilense*. The tree was made as described in Stam et al.  
327 2016 [5]. Clades with high (>80%) bootstrap values are collapsed. Most previously described clades can be  
328 identified and are indicated as such. The TNL family is highlighted in yellow. Several previously identified  
329 NLR genes from different species are included for comparison and Apaf1.1 and Ced4 are used as an  
330 outgroup, similar as in [20,21,60]. Clades marked with an asterisk are NRC-dependent. NLR with orthologs  
331 (based on reciprocal best blast hits) in *S. pennellii* are in bold.

332 Clades CNL20 and CNL21 are new in *S. chilense*.

333

334

335 S Figure 1

336 Dotplot analysis of *S. chilense* scaffolds against the *S. lycopersicum* chromosome, made using D-Genies  
337 [35]. Green lines indicate >75% identity. Orange >60%. The x axis shows the *S. lycopersicum* chromosomes  
338 and the y axis the *S. chilense* scaffolds

339

340 S Figure 2

341 Phylogenetic tree (ML) of *S. pennellii* and *S. chilense* NLRs. Several clades are highlighted to illustrate  
342 clades with even numbers (NRC), clades with higher numbers for *S. pennellii* (CNL8), for *S. chilense* (CNL6)  
343 and newly discovered clades (CNL20, CNL21)

## 344 References

1. Tomato-Genome-Consortium, Consortium sol genomics. The tomato genome sequence provides insights into fleshy fruit evolution. *Nature*. 2012;485:635–641.
2. Lin T, Zhu G, Zhang J, Xu X, Yu Q, Zheng Z, et al. Genomic analyses provide insights into the history of tomato breeding. *Nat Genet*. 2014;46:1220–6.
3. Bolger A, Scossa F, Bolger ME, Lanz C, Maumus F, Tohge T, et al. The genome of the stress-tolerant wild tomato species *Solanum pennellii*. *Nat Genet*. 2014;46:1034–8.
4. Pease JB, Haak DC, Hahn MW, Moyle LC. Phylogenomics Reveals Three Sources of Adaptive Variation during a Rapid Radiation. *PLOS Biol*. 2016;14:e1002379.
5. Städler T, Arunyawat U, Stephan W. Population genetics of speciation in two closely related wild tomatoes (*Solanum* section *Lycopersicon*). *Genetics*. 2008;178:339–50.
6. Arunyawat U, Stephan W, Städler T. Using multilocus sequence data to assess population structure, natural selection, and linkage disequilibrium in wild tomatoes. *Mol Biol Evol*. 2007;24:2310–22.
7. Böndel KB, Lainer H, Nosenko T, Mboup M, Tellier A, Stephan W. North–South Colonization Associated with Local Adaptation of the Wild Tomato Species *Solanum chilense*. *Mol Biol Evol*. 2015;32:2932–43.
8. Xia H, Camus-Kulandaivelu L, Stephan W, Tellier A, Zhang Z. Nucleotide diversity patterns of local adaptation at drought-related candidate genes in wild tomatoes. *Mol Ecol*. 2010;19:4144–54.
9. Zhou S, Sauvé RJ, Liu Z, Reddy S, Bhatti S, Hucko SD, et al. Identification of Salt-induced Changes in Leaf and Root Proteomes of the Wild Tomato, *Solanum chilense*. *J Am Soc Hortic Sci*. 2011;136:288–302.
10. Martínez J-P, Antúnez A, Pertuzé R, Acosta MDP, Palma X, Fuentes L, et al. Effects of saline water on water status, yield and fruit quality of wild (*Solanum chilense*) and domesticated (*Solanum lycopersicum* var. *Cerasiforme*) tomatoes. *Exp Agric*. 2012;48:573–86.
11. Nosenko T, Böndel KB, Kumpfmüller G, Stephan W. Adaptation to low temperatures in the wild tomato species *Solanum chilense*. *Mol Ecol*. 2016;25:2853–69.
12. Fischer I, Steige KA, Stephan W, Mboup M. Sequence Evolution and Expression Regulation of Stress-Responsive Genes in Natural Populations of Wild Tomato. *PLOS ONE*. 2013;8:e78182.
13. Böndel KB, Nosenko T, Stephan W. Signatures of natural selection in abiotic stress-responsive genes of *Solanum chilense*. *R Soc Open Sci* [Internet]. 2018 [cited 2018 Sep 9];5. Available from: <https://www.ncbi.nlm.nih.gov/pmc/articles/PMC5792908/>
14. Iqic B, Smith WA, Robertson KA, Schaal BA, Kohn JR. Studies of self-incompatibility in wild tomatoes: I. S-allele diversity in *Solanum chilense* Dun. (*Solanaceae*). *Heredity*. 2007;99:553–61.
15. Tellier A, Laurent SJY, Lainer H, Pavlidis P, Stephan W. Inference of seed bank parameters in two wild tomato species using ecological and genetic data. *Proc Natl Acad Sci U S A*. 2011;108:17052–7.
16. Tabaeizadeh Z, Agharbaoui Z, Harrak H, Poysa V. Transgenic tomato plants expressing a *Lycopersicon chilense* gene demonstrate improved resistance to *Verticillium dahliae* race 2. *Plant Cell Rep*. 1999;19:197–202.
17. Verlaan MG, Hutton SF, Ibrahim RM, Kormelink R, Visser RGF, Scott JW, et al. The Tomato Yellow Leaf Curl Virus Resistance Genes Ty-1 and Ty-3 Are Allelic and Code for DFDGD-Class RNA-Dependent RNA Polymerases. *PLOS Genet*. 2013;9:e1003399.
18. Jones JDG, Vance RE, Dangl JL. Intracellular innate immune surveillance devices in plants and animals. *Science*. 2016;354:aaf6395.
19. Baggs E, Dagdas G, Krasileva K. NLR diversity, helpers and integrated domains: making sense of the NLR IDentity. *Curr Opin Plant Biol*. 2017;38:59–67.

20. Andolfo G, Jupe F, Witek K, Etherington GJ, Ercolano MR, Jones JDG. Defining the full tomato NB-LRR resistance gene repertoire using genomic and cDNA RenSeq. *BMC Plant Biol.* 2014;14:120.
21. Stam R, Scheikl D, Tellier A. Pooled Enrichment Sequencing Identifies Diversity and Evolutionary Pressures at NLR Resistance Genes within a Wild Tomato Population. *Genome Biol Evol.* 2016;8:1501–15.
22. Michelmore RW, Meyers BC. Clusters of resistance genes in plants evolve by divergent selection and a birth-and-death process. *Genome Res.* 1998;8:1113–30.
23. Zuriaga E, Blanca J, Nuez F. Classification and phylogenetic relationships in *Solanum* section *Lycopersicon* based on AFLP and two nuclear gene sequences. *Genet Resour Crop Evol.* 2009;56:663–78.
24. The 100 Tomato Genome Sequencing Consortium, Aflitos S, Schijlen E, de Jong H, de Ridder D, Smit S, et al. Exploring genetic variation in the tomato (*Solanum* section *Lycopersicon*) clade by whole-genome sequencing. *Plant J.* 2014;80:136–48.
25. Lunter G, Goodson M. Stampy: a statistical algorithm for sensitive and fast mapping of Illumina sequence reads. *Genome Res.* 2011;21:936–9.
26. Tanksley SD, Ganai MW, Prince JP, Devicente MC, Bonierbale MW, Broun P, et al. High-density molecular linkage maps of the tomato and potato genomes. *Genetics.* 1992;132:1141–60.
27. Rose LE, Grzeskowiak L, Hörger AC, Groth M, Stephan W. Targets of selection in a disease resistance network in wild tomatoes. *Mol Plant Pathol.* 2011;12:921–7.
28. Peralta IE, Spooner DM, Knapp S, Anderson C. Taxonomy of wild tomatoes and their relatives (*Solanum* sect. *Lycopersicoides*, sect. *Juglandifolia*, sect. *Lycopersicon*; Solanaceae). *Syst Bot Monogr.* 2008;84.
29. Stamatakis A. RAxML version 8: a tool for phylogenetic analysis and post-analysis of large phylogenies. *Bioinformatics.* 2014;30:1312–3.
30. Kearse M, Moir R, Wilson A, Stones-Havas S, Cheung M, Sturrock S, et al. Geneious Basic: an integrated and extendable desktop software platform for the organization and analysis of sequence data. *Bioinforma Oxf Engl.* 2012;28:1647–9.
31. Guindon S, Dufayard J-F, Lefort V, Anisimova M, Hordijk W, Gascuel O. New Algorithms and Methods to Estimate Maximum-Likelihood Phylogenies: Assessing the Performance of PhyML 3.0. *Syst Biol.* 2010;59:307–21.
32. Rambaut A, Drummond A. FigTree v1. 3.1. 2009.
33. Boetzer M, Henkel CV, Jansen HJ, Butler D, Pirovano W. Scaffolding pre-assembled contigs using SSPACE. *Bioinformatics.* 2011;27:578–9.
34. Boetzer M, Pirovano W. Toward almost closed genomes with GapFiller. *Genome Biol.* 2012;13:R56.
35. Walker BJ, Abeel T, Shea T, Priest M, Abouelliel A, Sakthikumar S, et al. Pilon: An Integrated Tool for Comprehensive Microbial Variant Detection and Genome Assembly Improvement. *PLOS ONE.* 2014;9:e112963.
36. Cabanettes F, Klopp C. D-GENIES: dot plot large genomes in an interactive, efficient and simple way. *PeerJ.* 2018;6:e4958.
37. Grabherr MG, Haas BJ, Yassour M, Levin JZ, Thompson DA, Amit I, et al. Trinity: reconstructing a full-length transcriptome without a genome from RNA-Seq data. *Nat Biotechnol.* 2011;29:644–52.
38. Xie Y, Wu G, Tang J, Luo R, Patterson J, Liu S, et al. SOAPdenovo-Trans: de novo transcriptome assembly with short RNA-Seq reads. *Bioinforma Oxf Engl.* 2014;30:1660–6.
39. Schulz MH, Zerbino DR, Vingron M, Birney E. Oases: robust de novo RNA-seq assembly across the dynamic range of expression levels. *Bioinforma Oxf Engl.* 2012;28:1086–92.



40. Gilbert D. Gene-omes built from mRNA seq not genome DNA. 7th Annu Arthropod Genomics Symp Notre Dame. 2013.
41. Simão FA, Waterhouse RM, Ioannidis P, Kriventseva EV, Zdobnov EM. BUSCO: assessing genome assembly and annotation completeness with single-copy orthologs. *Bioinformatics*. 2015;31:3210–2.
42. Wang W, Haberer G, Gundlach H, Gläßer C, Nussbaumer T, Luo MC, et al. The *Spirodela polyrhiza* genome reveals insights into its neotenus reduction fast growth and aquatic lifestyle. *Nat Commun*. 2014;5:ncomms4311.
43. Stanke M, Keller O, Gunduz I, Hayes A, Waack S, Morgenstern B. AUGUSTUS: ab initio prediction of alternative transcripts. *Nucleic Acids Res*. 2006;34:W435–9.
44. Korf I. Gene finding in novel genomes. *BMC Bioinformatics*. 2004;5:59.
45. Parra G, Blanco E, Guigó R. GeneID in *Drosophila*. *Genome Res*. 2000;10:511–5.
46. Salamov AA, Solovyev VV. Ab initio gene finding in *Drosophila* genomic DNA. *Genome Res*. 2000;10:516–22.
47. Majoros WH, Pertea M, Salzberg SL. TigrScan and GlimmerHMM: two open source ab initio eukaryotic gene-finders. *Bioinformatics*. 2004;20:2878–9.
48. Allen JE, Salzberg SL. JIGSAW: integration of multiple sources of evidence for gene prediction. *Bioinformatics*. 2005;21:3596–603.
49. Gremme G, Brendel V, Sparks ME, Kurtz S. Engineering a software tool for gene structure prediction in higher organisms. *Inf Softw Technol*. 2005;47:965–78.
50. Zdobnov EM, Apweiler R. InterProScan—an integration platform for the signature-recognition methods in InterPro. *Bioinformatics*. 2001;17:847–848.
51. Bolger A, Lohse M, Usadel B. Trimmomatic: A flexible trimmer for Illumina Sequence Data. *Bioinformatics*. 2014;btu170.
52. Dobin A, Davis CA, Schlesinger F, Drenkow J, Zaleski C, Jha S, et al. STAR: ultrafast universal RNA-seq aligner. *Bioinformatics*. 2013;29:15–21.
53. Liao Y, Smyth GK, Shi W. featureCounts: an efficient general purpose program for assigning sequence reads to genomic features. *Bioinformatics*. 2014;30:923–30.
54. Conesa A, Götz S. Blast2GO: A comprehensive suite for functional analysis in plant genomics. *Int J Plant Genomics*. 2008;2008:619832.
55. Altschul SF, Madden TL, Schaffer AA, Zhang J, Zhang Z, Miller W, et al. Gapped BLAST and PSI-BLAST: a new generation of protein database search programs. *Nuc Acids Res*. 1997;25:3389 – 402.
56. Moriya Y, Itoh M, Okuda S, Yoshizawa AC, Kanehisa M. KAAS: an automatic genome annotation and pathway reconstruction server. *Nucleic Acids Res*. 2007;35:W182–5.
57. Proost S, Fostier J, De Witte D, Dhoedt B, Demeester P, Van de Peer Y, et al. i-ADHoRe 3.0—fast and sensitive detection of genomic homology in extremely large data sets. *Nucleic Acids Res*. 2012;40:e11.
58. Borrelli GM, Mazzucotelli E, Marone D, Crosatti C, Michelotti V, Valè G, et al. Regulation and Evolution of NLR Genes: A Close Interconnection for Plant Immunity. *Int J Mol Sci*. 2018;19.
59. Steuernagel B, Jupe F, Witek K, Jones JDG, Wulff BBH. NLR-parser: rapid annotation of plant NLR complements. *Bioinforma Oxf Engl*. 2015;31:1665–7.
60. Jupe F, Witek K, Verweij W, Śliwka J, Pritchard L, Etherington GJ, et al. Resistance gene enrichment sequencing (RenSeq) enables reannotation of the NB-LRR gene family from sequenced plant genomes and rapid mapping of resistance loci in segregating populations. *Plant J*. 2013;76:530–44.





## Figure Legends

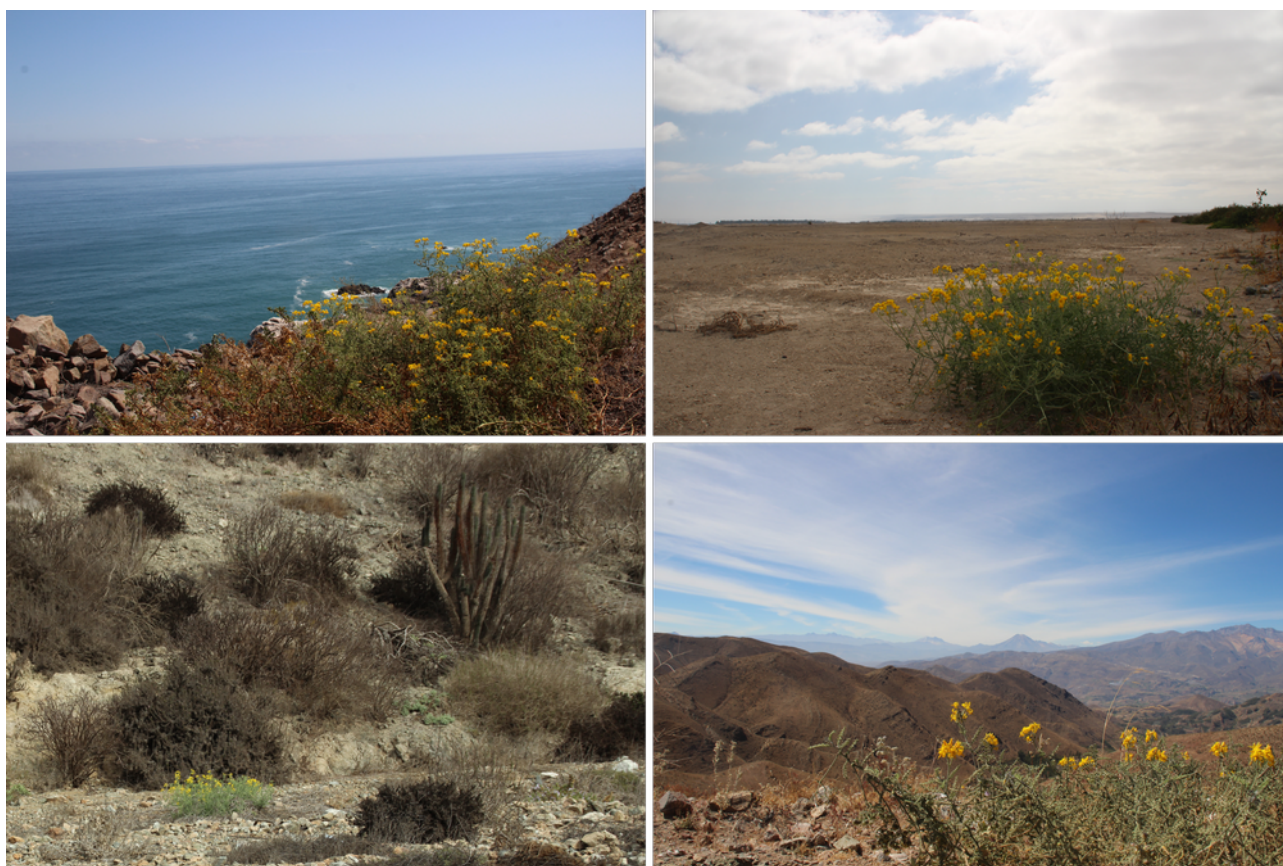

Figure 1

Pictures of *S. chilense* populations in their natural habitat (taken by R. Stam). The top panels show coastal and lowland habitats, the lower panels, typical mountain habitats. LA3111 originates from a mountainous habitat, similar to the last panel.

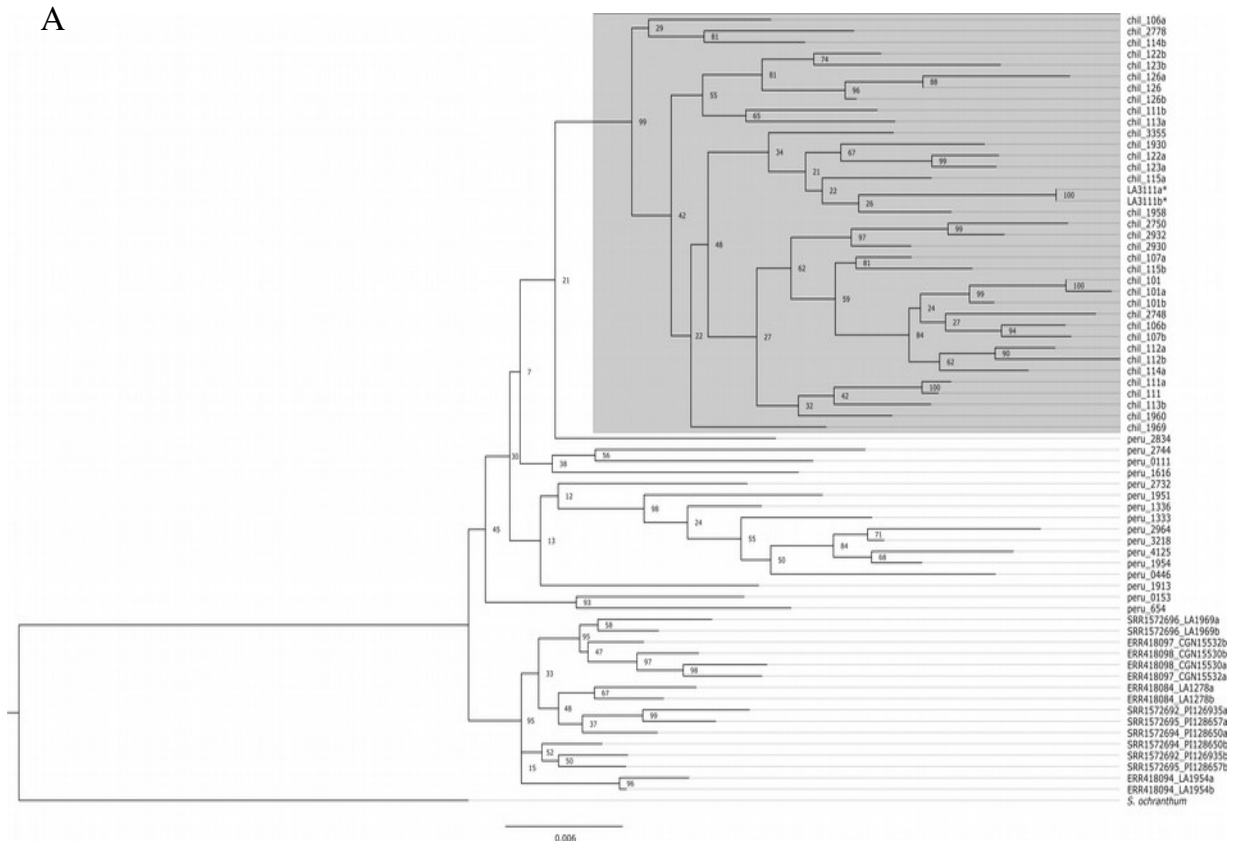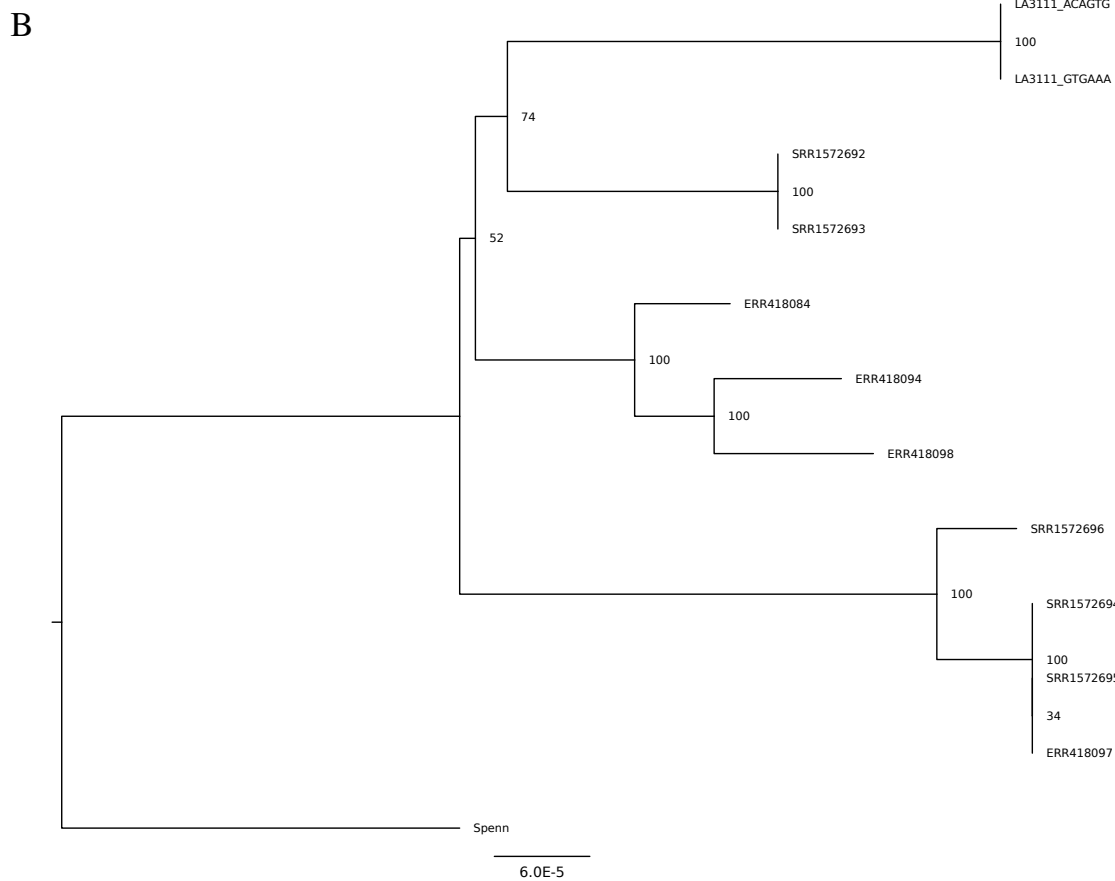

## Figure 2

A) Phylogeny based on six CT loci (nuclear genes) extracted from our sequenced *S. chilense* sample and previously sequenced *S. peruvianum* and alleged *S. chilense* samples. Our specimen from accession LA3111, is indicated with \*.

The phylogeny was constructed after extracting the data mapped to the *S. pennellii* reference genome. A tree was built for the aligned and concatenated sequences using the Maximum Likelihood method (1000 bootstrap replicates). Bootstrap values are reported on each of the branches. *Solanum ochranthum* was used as an outgroup. Chil and peru indicates Sanger sequence from *S. chilense* and *S. peruvianum* individuals, respectively.

B) Phylogeny of SNPs in chloroplasts extracted from our sequenced *S. chilense* sample and previously sequenced *S. peruvianum* and alleged *S. chilense* samples.

The tree was constructed after extracting the data mapped to the *S. pennellii* reference genome. A tree was built for the aligned sequences using PhyML (GTR, NNI, BioNJ, 1000 bootstrap replicates). Bootstrap values are reported on each of the branches.

Individuals ERR418084 and ERR418094: *S. peruvianum* (data from Aflitos et al. 2014), individuals ERR418097 and ERR418098: formerly labelled as *S. chilense*, but probably different species identity (data from Aflitos et al. 2014). This classification has since been withdrawn from the CGN database. The accompanying pictures on the CGN website are not showing *S. chilense* plants. Individuals SRR1572692, SRR1572694 and SRR1572695: *S. peruvianum* (data from Jin et al. 2014), and individual SRR1572696: was reported as *S. chilense* in the main text of the paper (Jin et al., 2014), but the authors confirm it is *S. peruvianum*, as is written in the supplementary data of their paper that contains all origin data. (data from Jin et al. 2014).

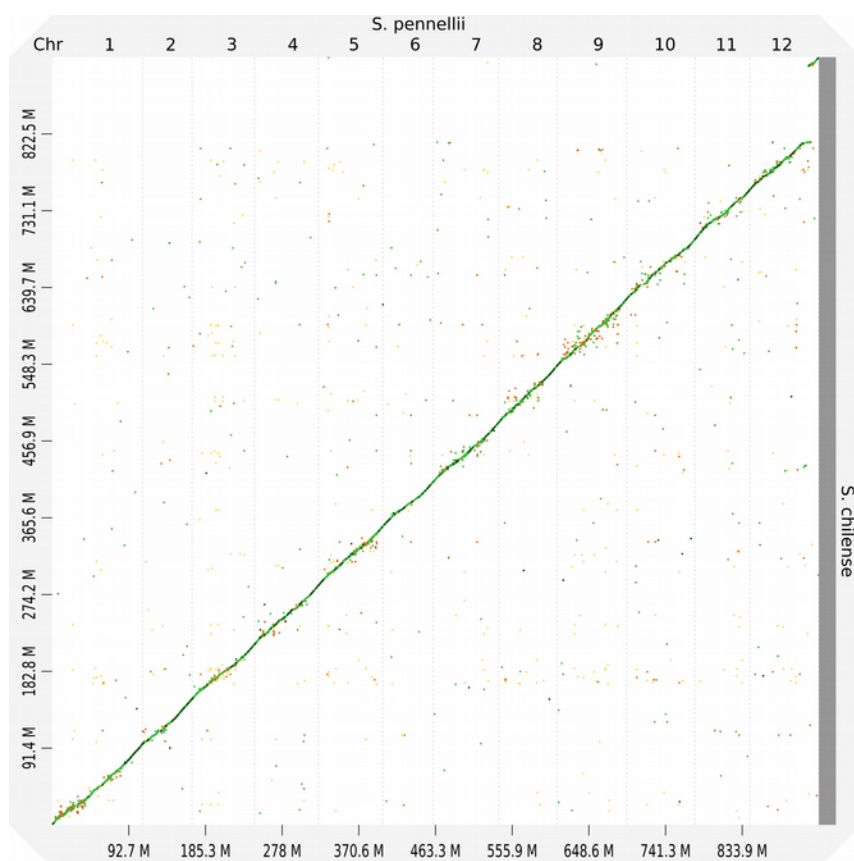

Figure 3

Dotplot analysis of *S. chilense* scaffolds against the *S. pennellii* chromosomes, made using D-Genies [35]. Green lines indicate >75% identity. Orange >60%. The x axis shows the position on *S. pennellii* chromosomes and the y axis on the *S. chilense* scaffolds

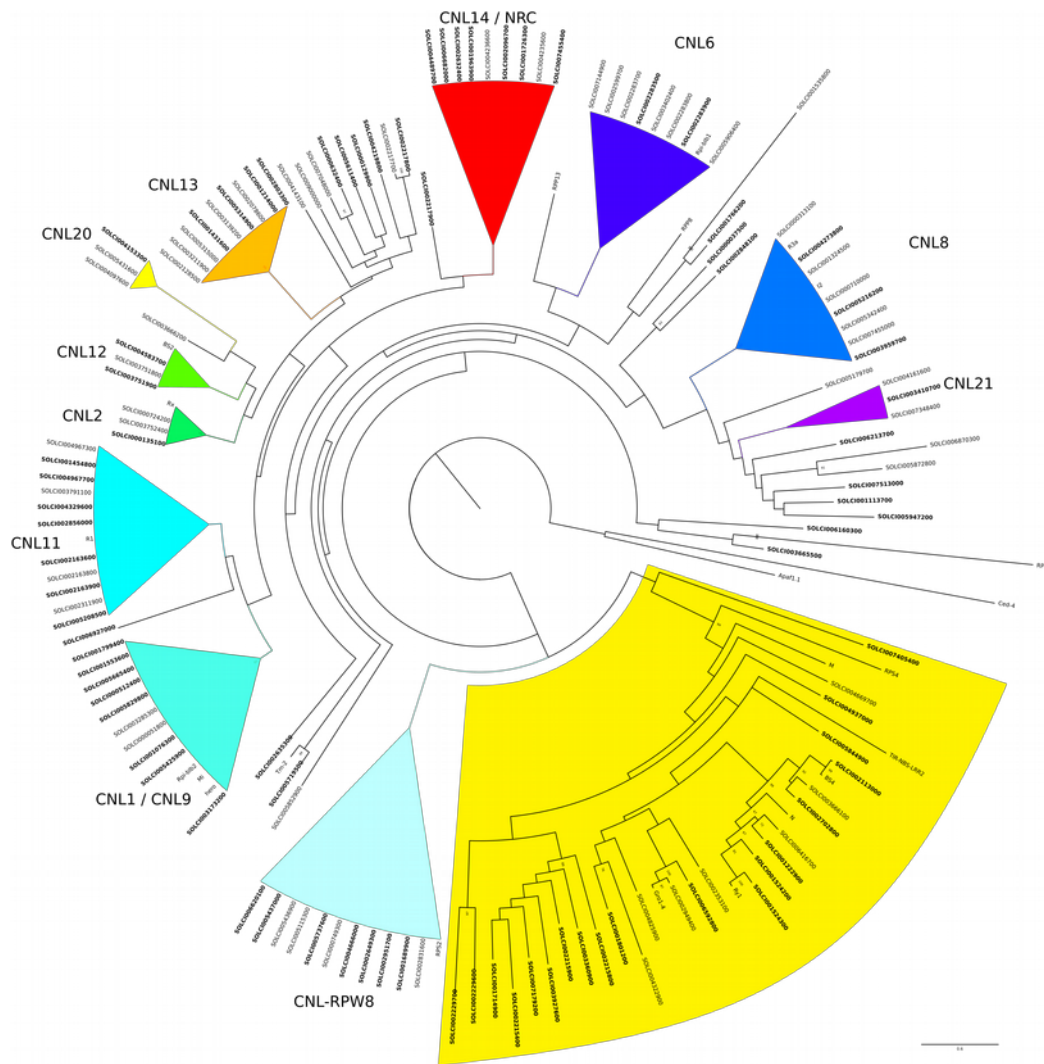

Figure 4

Phylogenetic tree (ML) for the NLRs identified in *S. chilense*. The tree was made as described in Stam et al. 2016 [5]. Clades with high (>80%) bootstrap values are collapsed. Most previously described clades can be identified and are indicated as such. The TNL family is highlighted in yellow. Several previously identified NLR genes from different species are included for comparison and Apaf1.1 and Ced4 are used as an outgroup, similar as in [20,21,59]. NLR with orthologs (based on reciprocal best blast hits) in *S. pennellii* are in bold. Clades CNL20 and CNL21 are new in *S. chilense*.

S Figure 1

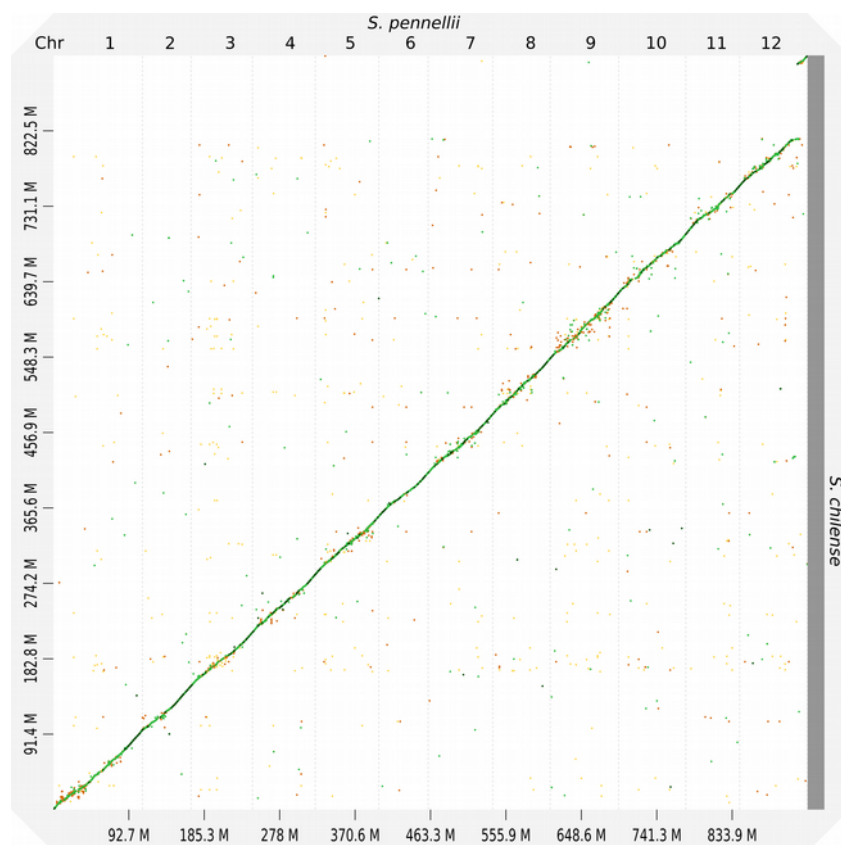

Dotplot analysis of *S. chilense* scaffolds against the *S. lycopersicum* chromosome, made using D-Genies [35]. Green lines indicate >75% identity. Orange >60%. The x axis shows the *S. lycopersicum* chromosomes and the y axis the *S. chilense* scaffolds



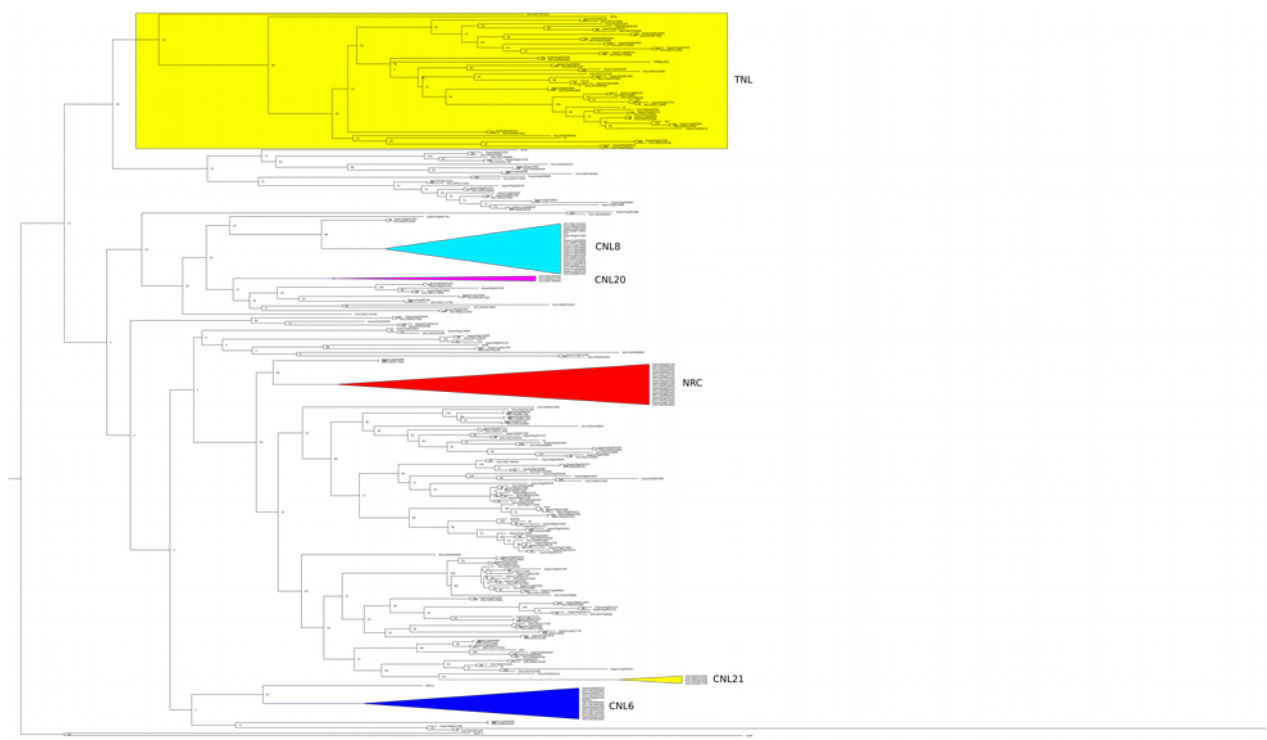

S Figure 2

Phylogenetic tree (ML) of *S. pennellii* and *S. chilense* NLRs. Several clades are highlighted to illustrate clades with even numbers (NRC), clades with higher numbers for *S. pennellii* (CNL8), for *S. chilense* (CNL6) and newly discovered clades (CNL20, CNL21)
